# Supplementary material for: An exonuclease III-amplified 4-way strand migration system for low-abundance deletion mutation
Source: Royal Society of Chemistry journal article supplement (doi:10.1039/d2ay01421a), 2022-01-01
Supplement: d2ay01421a1.pdf [file d2ay01421a1.pdf]

## Supplementary Data

### **Exonuclease III- amplified 4-way strand migration system for low-abundance deletion mutation**

Xiaofeng Tang<sup>1, 2‡</sup>, Qiaolin Li<sup>3‡</sup>, Juan Wang<sup>4‡</sup>, Shanling Liu<sup>1, 2\*</sup>

<sup>1</sup> Prenatal Diagnosis Center, West China Second University Hospital, Sichuan University, Chengdu, Sichuan, 610041, China

<sup>2</sup> Key Laboratory of Birth Defects and Related Diseases of Women and Children, Ministry of Education, Sichuan University, Chengdu, 610041, China

<sup>3</sup> Department of Hepatobiliary Surgery, The First Affiliated Hospital, Yangtze University, Jingzhou, 434023, China

<sup>4</sup> Department of Pathology, Ningxia Medical University, Yinchuan, Ningxia, 750001, China.

‡ The authors contributed equally

\*To whom correspondence should be addressed. Shanling Liu, Email: sunny630@126.com;

## **Table of contents**

### **SI 1 Supplementary Materials**

- 1. 1 Sequences of oligonucleotides used in this work**

### **SI 2 Supplementary Notes**

- 2.1 Optimize the buffer for Exonuclease III**
- 2.2 Optimize the concentration for Exonuclease III**
- 2.3 Deletion mutation specific primer for sanger sequencing**

### **SI 3 Supplementary Figures**

- 3.1 The optimization of Exo III buffer**
- 3.2 The optimization of Blocker.**
- 3.3 The optimization of Exo III concentration**
- 3.4 The linear fitting of the rate and mutation abundance**
- 3.5 The free energy of and the conversion of eight types of deletion length**
- 3.6 The free energy of and the conversion of eight types of deletion length**
- 3.7 The sanger sequencing with Deletion specific primer**

## SI 1 Supplementary Materials

### 1. 1 Sequences of oligonucleotides used in this work.

**Table S1.** The core DNA sequences of used in detecting EGFR exon 19 del

| Strand Name            | Sequence (5'-3')                                                                                                           |
|------------------------|----------------------------------------------------------------------------------------------------------------------------|
| WT- EGFR-15nt          | TTAAA ATTCCCGTCGCTATC AAG GAA TTA AGA GAA GCA<br>ACATCTCCGAAAGCC AACAA                                                     |
| MT- EGFR-15nt          | TTAAA ATTCCCGTCGCTATCAAGACATCTCCGAAAGCC AACAA                                                                              |
| D-Probe-FAM-EGFR-15nt  | AAGACATCTCCGAAAGCC AACAA                                                                                                   |
| D-Probe-BHQ- EGFR-15nt | GGCTTTCGGAGA TGT CTTGATAGCGACGGGAAT                                                                                        |
| Blocker- EGFR-15nt     | TGT TGC TTC TCT TAA TTC CTT                                                                                                |
| PCR-WT- EGFR-15nt      | GACTCTGGATCCCAGAAGGTGAGAAAAGTTAAAATTCCCGTCGCTATCAAGGAATT<br>AAGAGAAGCAACATCTCCGAAAGCCAACAAGGAAATCCTCGATGTGAGTTTCTG<br>CTTT |
| PCR-MT-EGFR-15nt       | GACTCTGGATCCCAGAAGGTGAGAAAAGTTAAAATTCCCGTCGCTATCAAAACATC<br>TCCGAAAGCCAACAAGGAAATCCTCGATGTGAGTTTCTGCTTT                    |
| PCR-FP- EGFR-15nt      | GACTCTGGATCCCAGAAG                                                                                                         |
| PCR-RP- EGFR-15nt      | AAAGCAGAAACTCACATCGA                                                                                                       |
| Specific-RP- EGFR-15nt | GGCTTTCGGAGATGTTTTG                                                                                                        |
| Plasmid- EGFR-15nt     | pUC57                                                                                                                      |

**Table S2.** The core DNA sequences of used in detecting PBRM1 c.3923-3930del

| Strand Name            | Sequence(5'-3')                                               |
|------------------------|---------------------------------------------------------------|
| WT- PBRM1-8nt          | TTCACCCAGAAGAAACAGAGCATGAGCCACAAAAATGTTCTACAAAAAGAAG<br>TATTT |
| MT- PBRM1-8nt          | TTCACCCAGAAGAAACAGAGCATGAAAAATGTTCTACAAAAAGAAGTATTT           |
| D-Probe-FAM- PBRM1-8nt | GCATGAAAAATGTTCTACAA                                          |
| D-Probe-BHQ- PBRM1-8nt | AGAACATTTTCATGCTCTGTTTCTT                                     |
| Blocker-1- PBRM1-8nt   | AGAACATTTTGTGGGCTGTAC                                         |
| Blocker-2- PBRM1-8nt   | AGAACATTTTGTGGGCT                                             |
| Blocker-3- PBRM1-8nt   | AGAACATTTTGTGGGCTCATGGTAC                                     |

|                   |                                                                                                           |
|-------------------|-----------------------------------------------------------------------------------------------------------|
| PCR-WT- PBRM1-8nt | GCCCCATCTTCATTCACCCAGAAGAAACAGAGCATGAGCCACAAAAATGTTCTA<br>CAAAAAAGAAGTATTTCTGAGTAATCTGGAAGAAACCTGCCCCATGA |
| PCR-MT- PBRM1-8nt | GGCCCCATCTTCATTCACCCAGAAGAAACAGAGCATGAAAATGTTCTACAAAA<br>AGAAGTATTTCTGAGTAATCTGGAAGAAACCTGCCCC            |
| PCR-FP- PBRM1-8nt | CCCCATCTTCATTCACCCAGA                                                                                     |
| PCR-RP- PBRM1-8nt | GGGCAGGTTTCTCCAGAT                                                                                        |

**Table S3.** The core DNA sequences of used in detecting EGFR c.2127-2129del

| Strand Name           | Sequence(5'-3')                                                |
|-----------------------|----------------------------------------------------------------|
| WT- EGFR-3nt          | AGCTCTTTGAGGATCTTGAAGGAAACTGAATTCAAAAAGATCAAAGTGCTGGG<br>CTCCG |
| MT- EGFR-3nt          | AGCTCTTTGAGGATCTTGAAGGATGAATTCAAAAAGATCAAAGTGCTGGGCTCC         |
| D-Probe-FAM- EGFR-3nt | G                                                              |
| D-Probe-BHQ- EGFR-3nt | AGGATGAATTCAAAAAGATC<br>TTTTTGAATTCATCCTTCAAGATCCT             |
| Blocker-1-EGFR-3nt    | GAATTCAGTTTCCTTCATCTA                                          |
| Blocker-2- EGFR-3nt   | TGAATTCAGTTTCCTTCAATCTA                                        |
| Blocker-3 EGFR-3nt    | TTGAATTCAGTTTCCTTCAAGTCTA                                      |

**Table S4.** The core DNA sequences of used in detecting different length of deletion mutation of PBRM1

| Strand Name            | Sequence(5'-3')                                              |
|------------------------|--------------------------------------------------------------|
| MT- PBRM1-8nt          | TTCACCCAGAAGAAACAGAGCATGAAAATGTTCTACAAAAAGAAGTATT            |
| D-Probe-FAM- PBRM1-8nt | GCATGAAAATGTTCTACAA                                          |
| D-Probe-BHQ- PBRM1-8nt | AGAACATTTTCATGCTCTGTTTCTT                                    |
| WT- PBRM1-8nt          | TTCACCCAGAAGAAACAGAGCATGAGCCACAAAAATGTTCTACAAAAAGAAG<br>TATT |
| WT- PBRM1-7nt          | TATT                                                         |
| WT- PBRM1-6nt          | CAGAAGAAACAGAGCATGGCCACAAAAATGTTCTACAAA                      |
| WT- PBRM1-5nt          | CAGAAGAAACAGAGCATGCCACAAAAATGTTCTACAAA                       |
| WT- PBRM1-4nt          | CAGAAGAAACAGAGCATGCCACAAAAATGTTCTACAAA                       |
| WT- PBRM1-3nt          | CAGAAGAAACAGAGCATGCACAAAAATGTTCTACAAA                        |
| WT- PBRM1-2nt          | CAGAAGAAACAGAGCATGACAAAAATGTTCTACAAA                         |

---

|                      |                                     |
|----------------------|-------------------------------------|
| WT- PBRM1-1nt        | CAGAAGAAACAGAGCATGCAAAAATGTTCTACAAA |
|                      | CAGAAGAAACAGAGCATGAAAAATGTTCTACAAA  |
| Blocker- PBRM1-8nt-4 | AGAACATTTTTGTGGGCTCATGCTCTGTGTAC    |
| Blocker- PBRM1-7nt   | AGAACATTTTTGTGGCCATGCTCTGTGTAC      |
| Blocker- PBRM1-6nt   | AGAACATTTTTGTGGCATGCTCTGTGTAC       |
| Blocker- PBRM1-5nt   | AGAACATTTTTGTGGCATGCTCTGTGTAC       |
| Blocker- PBRM1-4nt   | AGAACATTTTTGTGCATGCTCTGTGTAC        |
| Blocker- PBRM1-3nt   | AGAACATTTTTGTCATGCTCTGTGTAC         |
| Blocker- PBRM1-2nt   | AGAACATTTTTGCATGCTCTGTGTAC          |
| Blocker- PBRM1-1nt-1 | AGAACATTTTTCATGCTCTGTGTAC           |
| Blocker- PBRM1-1nt-2 | TAGAACATTTTTCATGCTCTGTGTAC          |

---

## **SI 2 Supplementary Notes**

### **2.1 Optimize the buffer for Exonuclease III**

According to the instruction of Exonuclease III (Exo III), 1X Exo III buffer (10mM Bis-tris (pH 7.0), 10mM MgCl<sub>2</sub>, 1mM DTT) was different from 1X ThermoPol buffer. ThermoPol buffer was usually used in nucleic acid detection research. So, we compared Exo III buffer with ThermoPol buffer in Exo III-assisted toehold probe system. The mutation abundance of 10% and 0% were detected by the system with two buffers separately. The results were shown in Fig. S1. ThermoPol buffer was better for detecting by Exo III-assisted toehold probe system.

### **2.2 Optimize the concentration for Exonuclease III**

According to the principle of the detection method, we needed to optimize the concentration of Exo III. Exo III was diluted by 60, 80, 100, and 120 times, and other experimental conditions were fixed as before. In order to obtain the optimal concentration, 10% group and 1% group were used to determine the effect of amplification. 0% group was used to analyze the background signal. The results were shown in Fig. S2 a, b, c. Exo III diluted by 100 times was the optimal concentration.

### **2.3 Deletion mutation specific primer for sanger sequencing**

In order to verify the results of the PCR products detected by Exo III-assisted toehold probe system were better than sanger sequencing. In addition to the conventional primer-mediated sanger sequencing which can detect MT and WT, we also sequenced the PCR products by deletion mutation specific primer which can detect MT and cannot detect WT. The sequencing results of deletion mutation specific primers were shown in Fig. S3. No matter sanger sequencing with conventional primer or deletion mutation specific primers, the low mutation abundances (1%-0%) cannot be distinguished.

## **SI 3 Supplementary Figures.**

### **3.1 The optimization of Exo III buffer**

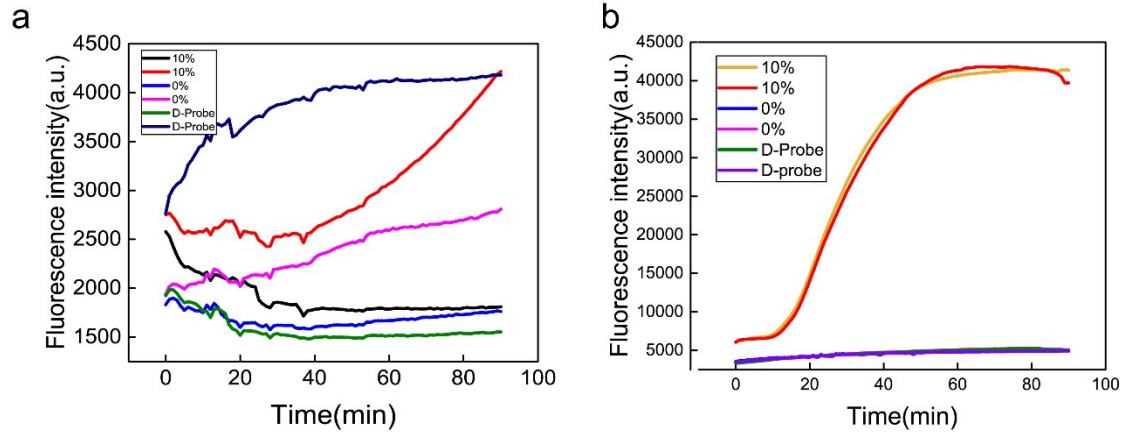

**Fig. S1.** a) Mutation abundance of 10%, 0% and D-Probe were detected by the system with Exo III buffer. b) Mutation abundance of 10%, 0% and D-Probe were detected by the system with ThermoPol buffer 1. Experiments were detected at 37 °C by BioTek, and the gain value was 60. The concentration of Blocker was 1000 nM and the other contents were 300 nM. The dilution ratio of Exo III was 100.

### 3. 2 The optimization of Blocker.

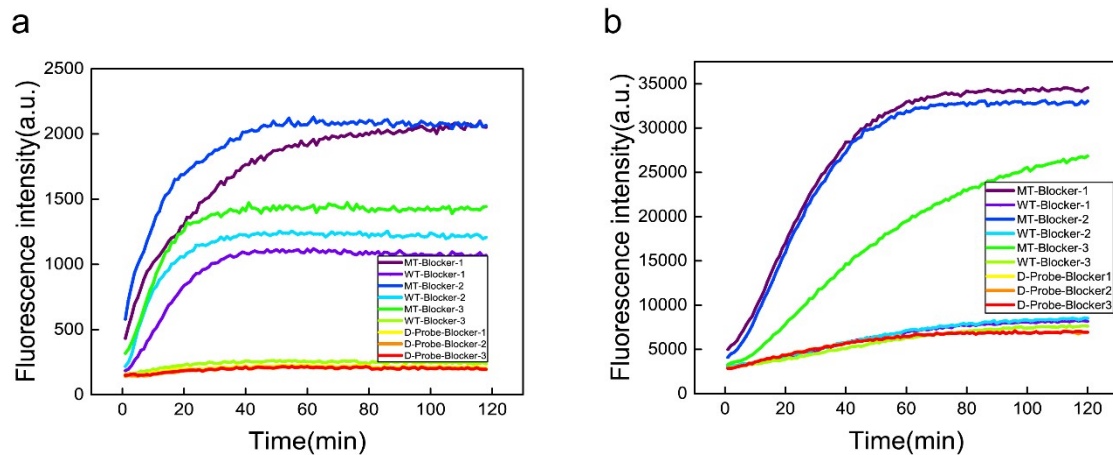

**Fig. S2.** a) The fluorescence intensity of PBRM1-8-nt del and the gain value was 120. b) The fluorescence intensity of EGFR-3-nt del and the gain value was 170. Experiments were detected at 37 °C by Tecan. The concentration of Blocker was 1000 nM and the other contents were 300 nM. The dilution ratio of Exo III was 100.

### 3.3 The optimization of Exo III concentration.

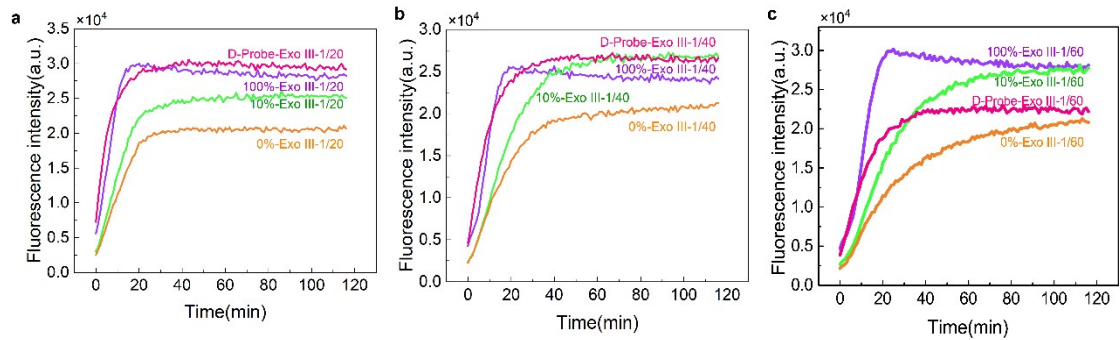

**Fig.S3 a, b, c** The fluorescence intensity of PBRM1-8-nt with the dilution ratio of 20,40,60. Experiments were detected at 37 °C by Tecan and the gain value was 170. The concentration of Blocker was 1000 nM and the other contents were 300 nM.

### 3.4 The linear fitting of the rate and mutation abundance

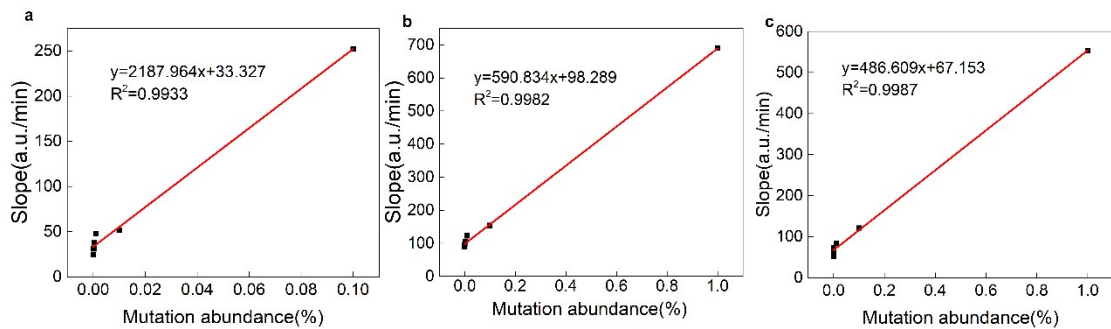

**Fig. S4** The linear fitting of EFGR-15-nt del(a), PBRM1-8-nt del(b) and EGFR-3-nt-del(c).

### 3.5 The free energy of and the conversion of eight types of deletion length

| Length of deletion sequence | $\Delta G_{(MT)}$ | $\Delta G_{(WT)}$ | Combination of WT and Blocker |
|-----------------------------|-------------------|-------------------|-------------------------------|
| 8                           | -5.00101          | 17.2057           | 100%                          |
| 7                           | -5.00354          | 16.9837           | 100%                          |
| 6                           | -5.17622          | 16.4317           | 100%                          |
| 5                           | -5.4981           | 15.6884           | 100%                          |
| 4                           | -6.5819           | 15.1364           | 100%                          |
| 3                           | -6.7255           | 14.4164           | 99%                           |
| 2                           | -6.7098           | 14.2694           | 99%                           |
| 1                           | -7.6753           | 9.69117           | 82%                           |

**Fig. S5** The free energy difference of MT and WT and binding ratio of Blocker and



WT.

### 3.6 The sanger sequencing results with ordinary primer

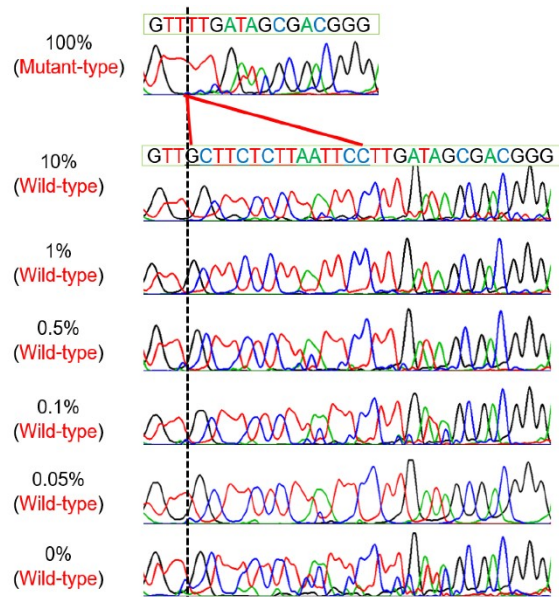

Fig. S6 The result of sanger sequencing with ordinary primer.

### 3.7 The sanger sequencing results with deletion specific primer

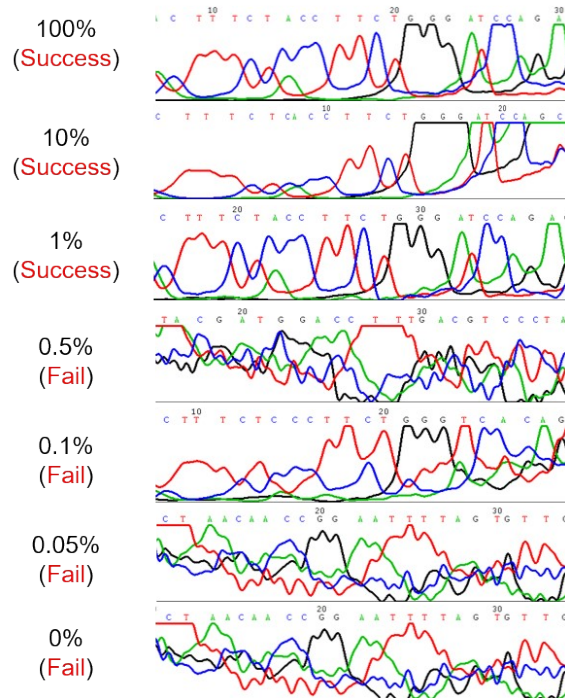

Fig. S7 The result of sanger sequencing with deletion specific primer.
